# Supplementary material for: Prevalence of Salmonella in Free-Range Pigs: Risk Factors and Intestinal Microbiota Composition
Source: MDPI journal article supplement (doi:10.3390/foods10061410), 2021-06-18
Supplement: s1 [file s1]

SUPPLEMENTARY MATERIAL

# Prevalence of *Salmonella* in free-range pigs: risk factors and intestinal microbiota composition

Victoria Garrido 1, Lourdes Migura-García 2, Inés Gaitán 1, Ainhoa Arrieta-Gisasola 3, Ilargi Martínez-Ballesteros 3, Lorenzo Fraile 4, and María Jesús Grilló 1,\*

<sup>1</sup> Animal Health Group, Instituto de Agrobiotecnología (CSIC-Gobierno de Navarra) Mutilva, Navarra, Spain; [victoria.garrido@csic.es](mailto:victoria.garrido@csic.es); [inesgaitanmarqueta@gmail.com](mailto:inesgaitanmarqueta@gmail.com); [mj.grillo@csic.es](mailto:mj.grillo@csic.es)

<sup>2</sup> IRTA, Centre de Recerca en Sanitat Animal (CReSA, IRTA-UAB), Universitat Autònoma de Barcelona, Campus UAB, 08193 Bellaterra, Barcelona, Spain; OIE Collaborating Centre for the Research and Control of Emerging and Re-emerging Swine Diseases in Europe (IRTA-CReSA), Bellaterra, Barcelona, Spain; [lourdes.migura@irta.cat](mailto:lourdes.migura@irta.cat)

<sup>3</sup> Mikrolker research group, Immunology, Microbiology and Parasitology Department, Faculty of Pharmacy, University of the Basque Country (UPV/EHU), Vitoria-Gasteiz, Spain; Bioaraba, Vitoria-Gasteiz, Spain; [ainhoa.arrieta@ehu.eus](mailto:ainhoa.arrieta@ehu.eus); [ilargi.martinez@ehu.eus](mailto:ilargi.martinez@ehu.eus)

<sup>4</sup> Departamento de Ciencia Animal, Universidad de Lleida, Lleida, Spain; [lorenzo.fraile@udl.cat](mailto:lorenzo.fraile@udl.cat)

\* Correspondence: [mj.grillo@csic.es](mailto:mj.grillo@csic.es)

**Table S1.** Contingency table with results of *Salmonella* identification by ISO 6579:2002/Amend. 1:2007 (ISO) and/or PCR-*invA* using MRSV as DNA source (PCR).

|        | ISO + | ISO - | Totals |
|--------|-------|-------|--------|
| PCR +  | 47    | 11    | 58     |
| PCR -  | 0     | 122   | 122    |
| Totals | 47    | 133   | 180    |

**Table S2.** Classification of farms by *Salmonella* prevalence in the intestinal content of free-range pigs and the risk factors associated by univariable analysis.

| Farms characteristics |                              |                                         | Risk factors  |                       |                                  |
|-----------------------|------------------------------|-----------------------------------------|---------------|-----------------------|----------------------------------|
| Farm code             | <i>Salmonella</i> prevalence | Number of animals/farm (n) <sup>1</sup> | Dry feed Diet | Extra-Diet            | Silo's cleaning and disinfection |
| 1                     | 86.7%                        | 140 (n=10)                              | A             | Grass                 | Shallow/No                       |
| 2                     | 53.3%                        | 130                                     | B             | Acorn                 | Shallow/No                       |
| 3                     | 46.7%                        | 160 (n=5)                               | A             | Grass                 | Shallow/No                       |
| 4                     | 46.7%                        | 140                                     | A             | Grass                 | Shallow/No                       |
| 5                     | 40%                          | 110                                     | A             | Acorn                 | Shallow/No                       |
| 6                     | 33.3%                        | 140                                     | A             | Grass                 | Shallow/No                       |
| 7                     | 26.7%                        | 80                                      | A             | Grass                 | Shallow/No                       |
| 8                     | 26.7%                        | 120                                     | A             | Grass                 | Shallow/No                       |
| 9                     | 20%                          | 140                                     | B             | Chestnut and Beechnut | Frequent/Yes                     |
| 10                    | 6.7%                         | 100                                     | B             | Acorn                 | Frequent/Yes                     |
| 11                    | 0                            | 100 (n=10)                              | B             | Acorn                 | Frequent/Yes                     |
| 12                    | 0                            | 100 (n=10)                              | C             | Chestnut and Beechnut | Shallow/No                       |

<sup>1</sup> Farms and number of pigs (n) selected for the microbiome study, showing high (n=15) or null (n=20) *Salmonella* prevalence.
